# Supplementary material for: Metabolomic Analysis of Fission Yeast at the Onset of Nitrogen Starvation
Source: MDPI journal article supplement (doi:10.3390/metabo3041118), 2013-12-13

## Supplementary Materials

**Figure S1.** MS/MS analysis of peaks identified as FGAR (A), SAICAR (B) and hercynylcysteine sulfoxide (C).

A

FGAR [M-H]<sup>-</sup>

LC-MS chromatogram

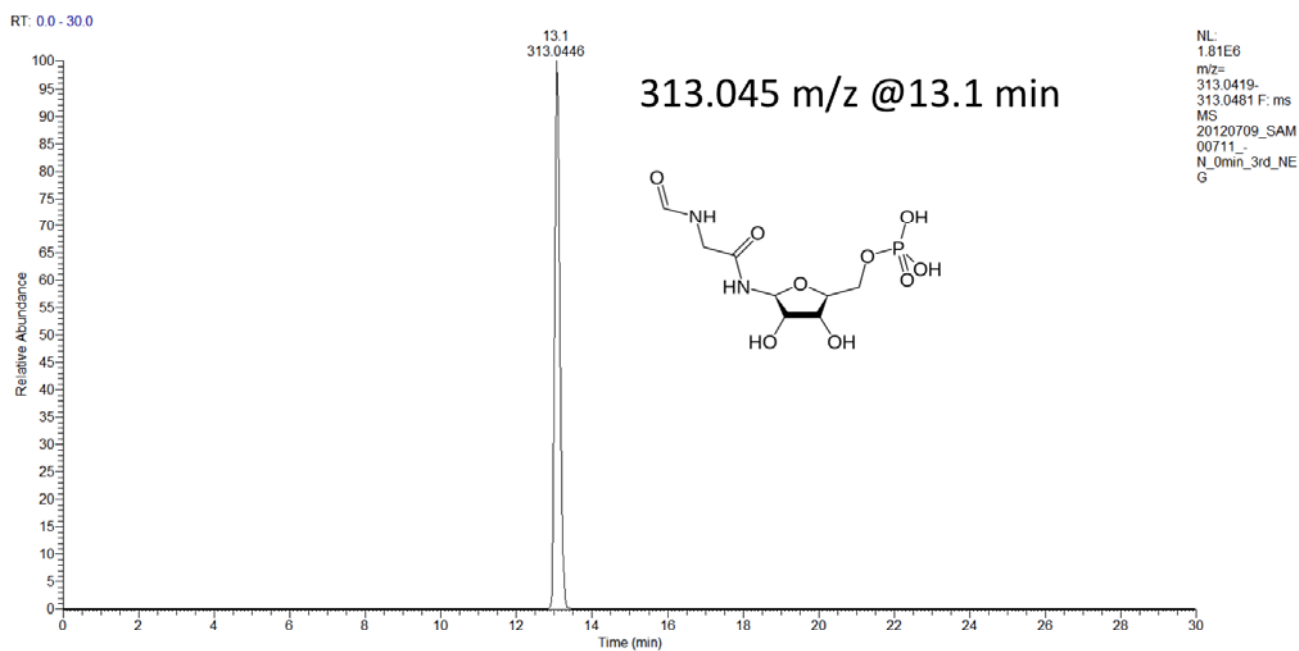

MS/MS fragmentation

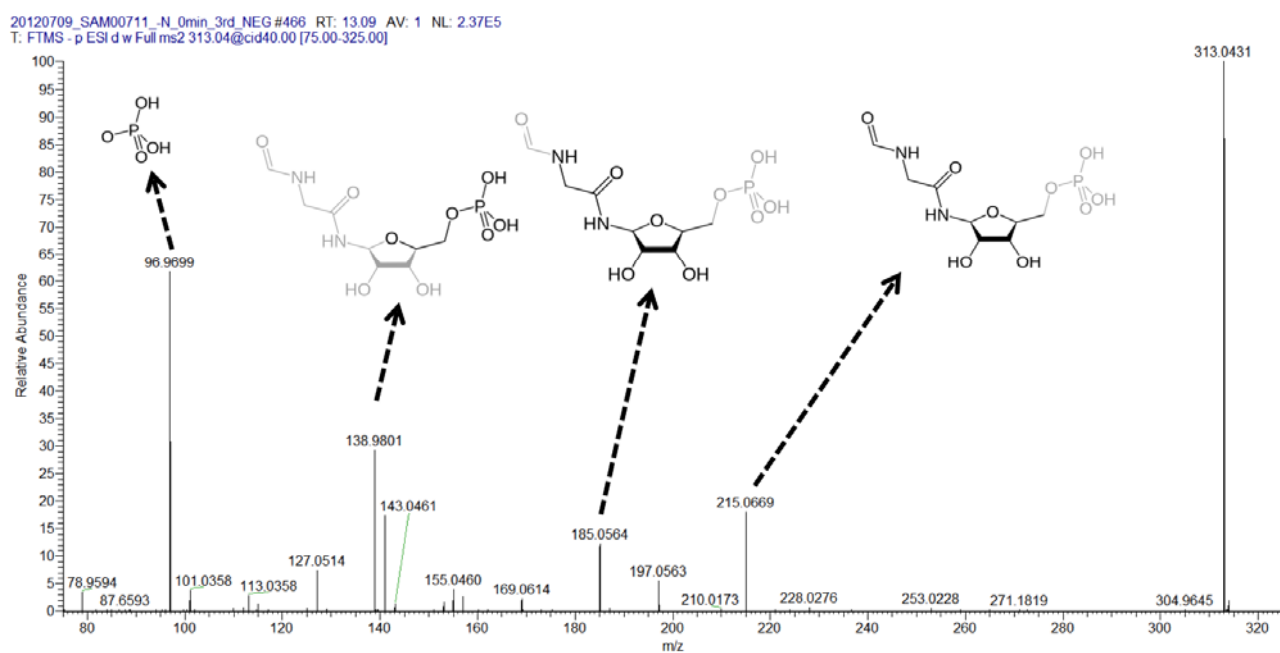

B

SAICAR [M-H]<sup>-</sup>

## LC-MS chromatogram

RT: 0.0 - 30.0

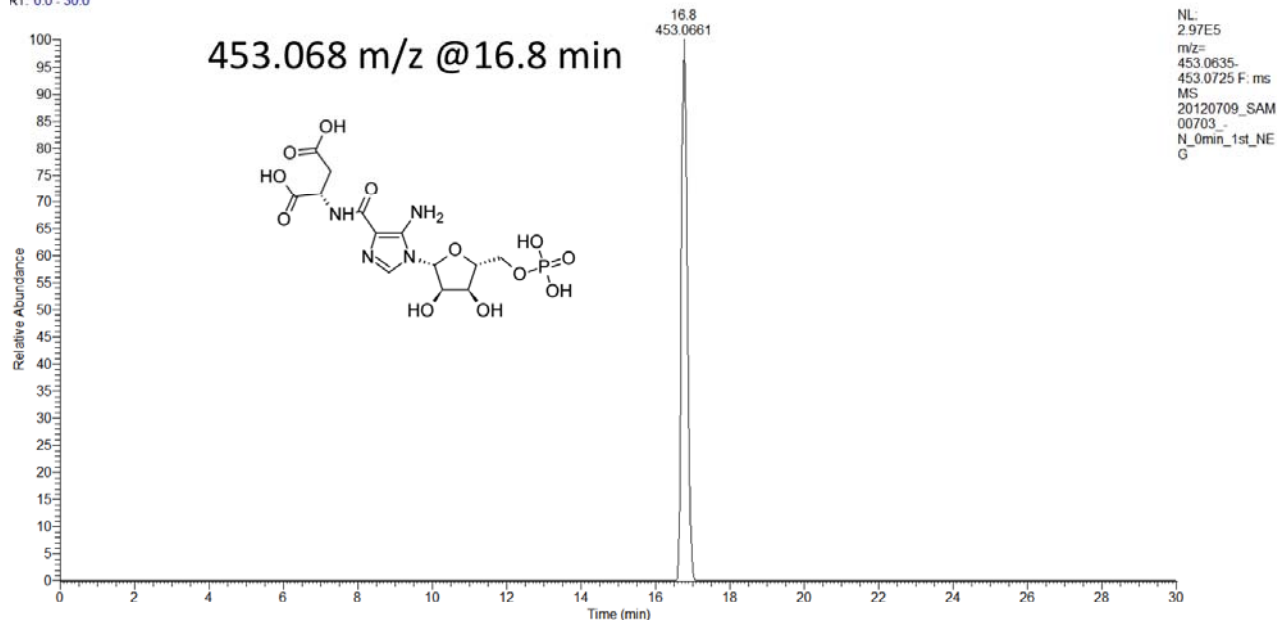

## MS/MS fragmentation

20120709\_SAM00703\_N\_0min\_1st\_NEG #601 RT: 16.81 AV: 1 NL: 7.60E4  
T: FTMS - p ESI d w Full ms2 453.07@cid40.00 [110.00-465.00]

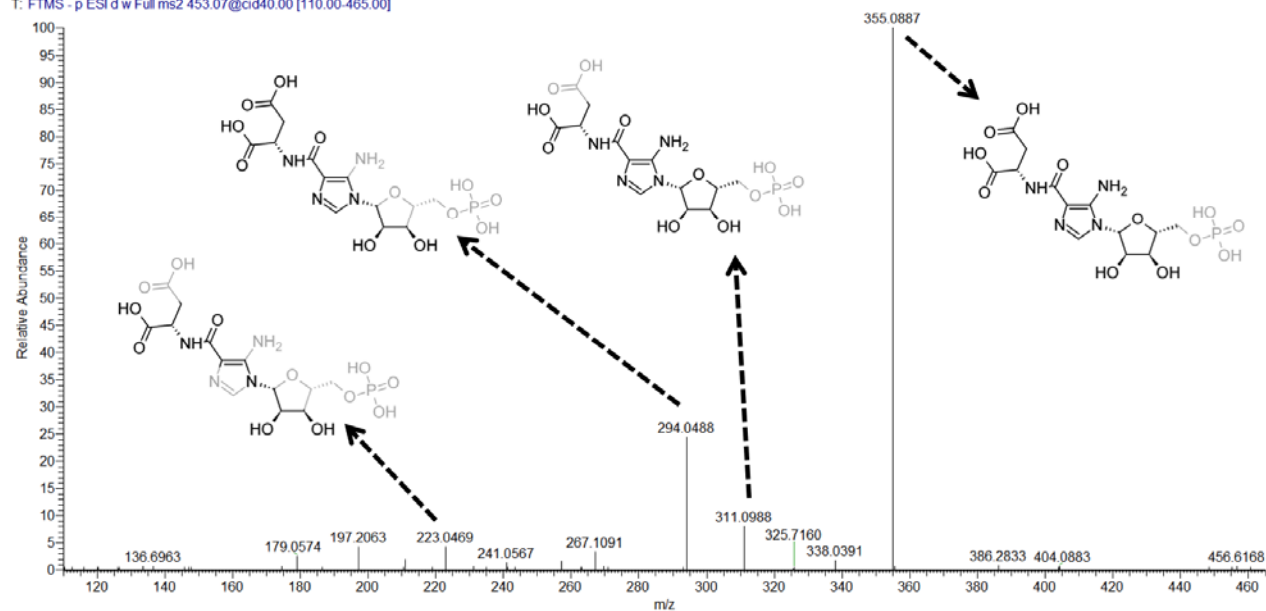

C

Hercynylcysteine sulfoxide  $[M+H]^+$ 

## LC-MS chromatogram

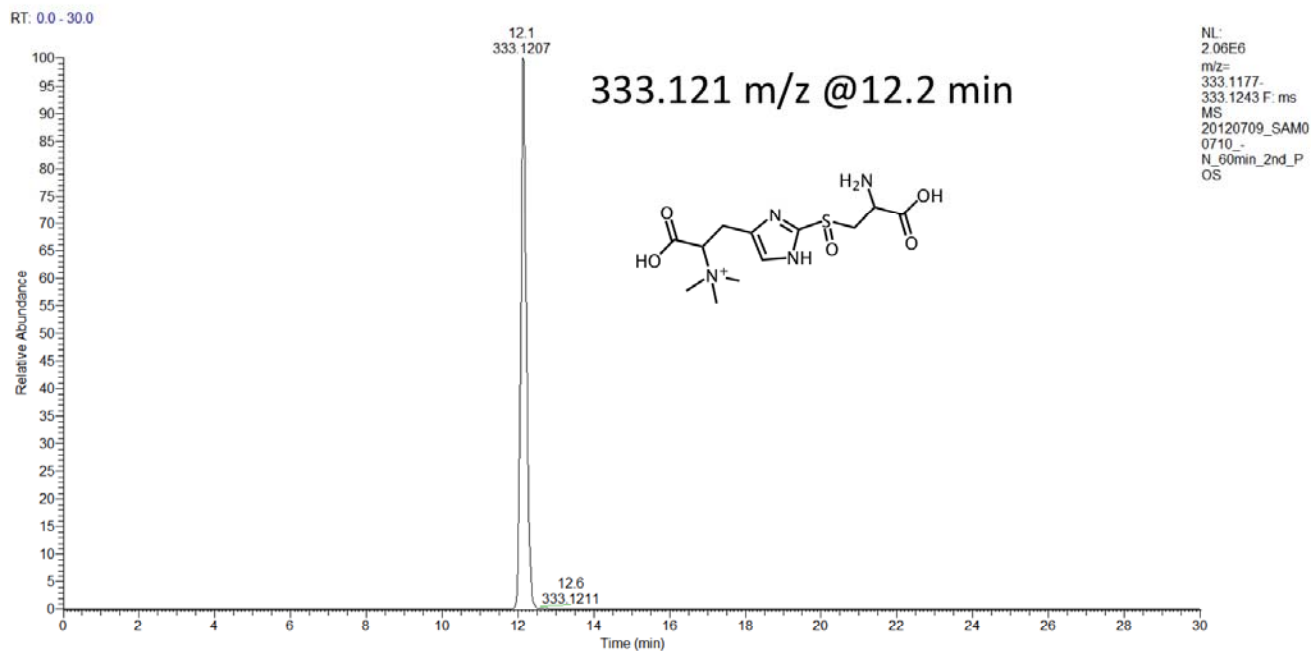

## MS/MS fragmentation

20131116\_G\_P3nmt1\_pos\_25 #442 RT: 11.35 AV: 1 NL: 2.89E6  
T: FTMS +p ESI d w Full ms2 333.12@cid40.00 [80.00-345.00]

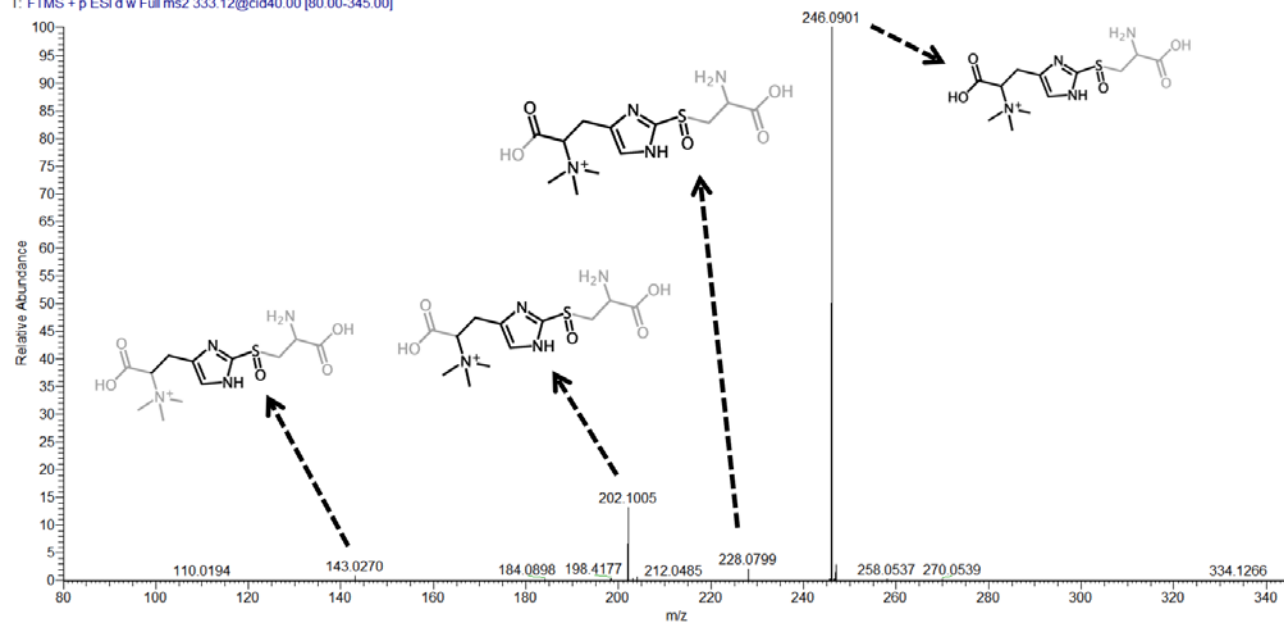

Supplement: s1 [file s1]
